# Supplementary material for: ChIP-Enrich: gene set enrichment testing for ChIP-seq data
Source: PubMed Central journal article supplement (PMC4117744; doi:10.1093/nar/gku463), 2014-05-30
Supplement: supp_gku463_nar-00162-met-g-2014-File006.pdf [file supp_gku463_nar-00162-met-g-2014-File006.pdf]

## ChIP-Enrich Supplementary Results

### *Effect of locus length and read mappability on gene set enrichment tests*

Gene set enrichment testing with Fisher's exact test (FET) can be confounded when there is a positive relationship between locus length and the presence of a peak, since many gene sets contain genes with substantially longer or shorter locus lengths than average [1]. Taher and Ovcharenko (2009) identified Gene Ontology (GO) terms with much longer or shorter than expected gene loci (defining a locus as the gene and half the intergenic region between adjacent genes) [2]. Similarly, when we assigned peaks to the gene with the nearest TSS, we found that GO terms related to nucleosome, protein-DNA complexes, and translation have genes with shorter than average locus lengths (Supplementary Table 3) and nervous system development, cell adhesion, and transcription have genes with longer than average locus lengths (Supplementary Table 4).

The probability of calling a ChIP-seq peak can depend on the mappability of the reads in the binding region [3, 4]. To account for mappability (which similar to locus length, varied significantly by gene set (Supplementary Figure 1)), we use locus length  $\times$  mappability as the observable locus length in our analyses; this can improve the spline fit (Supplementary Figure 2), although it had little effect on the final results of the presented enrichment testing analyses (*data not shown*). To assess the ability of mappability to confound the relationship between the presence of a peak and gene set membership, we estimated the average mappability of each gene locus based on base pair mappabilities for 50bp reads (see Supplementary Figure 1a for comparison of mappability at different read lengths). Genes with less mappable loci are significantly more likely to be present in sensory, xenobiotic response and oxygen related terms, whereas genes with highly mappable loci are more likely to be involved in nervous system or development terms (  $q$ -value  $< 3.0 \times 10^{-16}$ ) (Supplementary Figure 1b,c). We observed similar results at other read lengths (*data not shown*). Several GO terms (e.g., central nervous system development) had both longer locus lengths and higher mappability, increasing the possibility for confounding.

In addition to mappability, GC content has also been noted to influence sequencability and thus detection of ChIP-seq peaks. To examine a potential bias due to GC content, we downloaded the UCSC Genome Browser's GC content track for hg19, which provides GC content for every 5bp. We calculated average GC content for four definitions of gene loci (*nearest TSS*, *exons*, *1kb* and *5kb*), and observed very little spread in the distribution of GC content. Testing for GO terms enriched with low or high GC content genes (using the *nearest TSS* definition and the same LRpath approach as used for testing low or high mappability genes), we found only 14 significant terms as compared to 717 significant terms for mappability (FDR $<0.05$ ). Given the tight distribution of GC content among gene loci and the small number of significantly associated GO terms, we conclude that it is unlikely that GC content is a confounding variable or significantly biases the enrichment testing results.

### *Comparison of ChIP-Enrich, Fisher's exact test, and the binomial test under the null hypothesis of no enrichment using simulated data*

To examine the sensitivity of each test to varying mixtures of peak distributions that meet the FET or binomial test assumptions, we simulated datasets of 10,000 peaks with 0%, 50%, and 100% of the peaks simulated in proportion to locus length relative to those simulated irrespective of locus length. As the percentage of peaks simulated in proportion to locus length increases from 0 to 100%, the relationship

between the probability of a gene having at least one peak and locus length changes from flat (Supplementary Figure 7a) to increasingly correlated (Supplementary Figure 7b,c).

Using our simulated datasets, we tested for GO term enrichment and plotted the observed  $-\log_{10}(\text{p-values})$  versus the expected  $-\log_{10}(\text{p-values})$  under the null hypothesis of no enrichment in quantile-quantile (QQ) plots (Supplementary Figure 7d-f.) For all three scenarios, ChIP-Enrich shows no inflation of significance levels from the expected distribution but has a slight deflation of the most significant p-values. When all peaks are simulated with each gene having equal probability of having a peak (0% proportional to locus length), Fisher's exact test shows the expected distribution of p-values (observed = expected) also with a slight deflation of the most significant p-values similar to ChIP-Enrich, expected due to the discrete nature of the data [5]. With an increasing percentage of peaks sampled in proportion to locus length, FET becomes increasingly anti-conservative (Supplementary Figure 7d  $\rightarrow$  e  $\rightarrow$  f), such that p-values as low as  $10^{-10}$  are observed in the absence of any true enrichment. The binomial test shows the opposite behavior; when peaks are sampled in proportion to locus length (100% proportional to locus length) and without any additional variability among genes in a gene set, the binomial test has the expected p-value distribution (again with a slight deflation as for FET when 0% random) but when peaks are sampled independent of locus length (0% proportional to locus length) the test becomes increasingly anti-conservative (Supplementary Figure 7f  $\rightarrow$  e  $\rightarrow$  d), with even lower p-values than observed for Fisher's exact test.

### *Test behaviors in the presence of overdispersion of peak counts among genes, given locus length*

To better understand the difference in binomial test behavior between 1) the H3K27me3 dataset GO term permutation by locus length bin (which shows a strong inflation of significance levels despite peaks occurring approximately in proportion to locus length) and 2) simulations in which 100% of peaks were simulated in proportion to locus length (Supplemental Figure 8f; which shows no inflation of significance levels when peaks occur in proportion to locus length), we performed additional simulations with 100% of the peaks simulated in proportion to locus length. In these simulations, we added increasing levels of extra variability (overdispersion) in peak counts among genes (gamma variance levels of 0.01, 0.1, and 0.5). The overdispersion did not visually change the observed spline fit (*not shown*). Again, we tested for GO term enrichment and plotted the observed  $-\log_{10}(\text{p-values})$  versus the expected  $-\log_{10}(\text{p-values})$  in QQ plots (Supplementary Figure 8). As before, ChIP-Enrich shows no inflation of significance levels. The binomial test, however, shows increasing inflation of significance levels with increasing overdispersion. FET shows decreasing levels of inflation with increasing overdispersion, but remained biased for each overdispersion scenario.

### *Slight deflation in p-values compared to what is expected under the null*

When the assumptions of Fisher's exact test are met, e.g. for the transcription factor SIX5, Fisher's exact test shows a slight deflation of the most significant p-values compared to what is expected if we assume a uniform distribution of p-values under the null hypothesis. This trend is expected due to the discrete nature of the data [5]. We observe the same slight deflation for both ChIP-Enrich (Figure 3c,g,k, and Supplementary Figures 7d,e,f, and 8b) and the binomial test (Supplementary Figures 7f and 8c) when the assumptions of the test are satisfied.

### *Sensitivity analysis for GR*

As a sensitivity analysis we also repeated the GR $\alpha$  analyses with a larger set of peaks identified using a less stringent cutoff. This set contains 15,837 peaks with p-value  $\leq 1 \times 10^{-9}$ , equivalent to an FDR  $< 0.23$  (Supplementary dataset 1 from Reddy et al.) [6]. Results using *nearest TSS* with the 15,837 peaks were similar to those from the more stringent peak calling ( $r = 0.61$  for  $-\log_{10}(\text{p-value})$  comparison) (see Supplementary text), with 81/216 (38%) of the significant GO terms also significant in the RNA-seq enrichment analysis. However, the  $\leq 1\text{kb}$  from TSS analysis results from the less stringent peak calling identified only 26 GO terms compared to 72 from the more stringent peak calling with only 8 GO terms in common. Only five (19%) of the 26 GO terms were also significant in the RNA-seq GOseq enrichment analysis, consistent with our finding in the main text that there is potentially stronger correspondence of gene expression data with GR $\alpha$  binding captured by *nearest TSS* (mainly distal regions) than only those peaks  $\leq 1\text{kb}$  from a TSS.

## Supplementary methods

### *Testing for enriched GO terms with genes of longer (or shorter) than average locus length*

We used DAVID [7] to test for GO term enrichment in the top 500 genes with longest (or shortest) locus lengths. For both tests, the complete set of genes in our locus definition file was used as the background gene list. Results were limited to GO terms with  $\leq 2,000$  genes and  $\text{FDR} \leq 0.05$  in order to report more specific categories.

### *Testing for enriched GO terms with genes having higher or lower than average mappability*

We tested for GO terms enriched with genes having higher or lower than expected mappability scores using a logistic regression model with GO term membership as the outcome and average gene locus mappability scores as the predictor (LRpath [8]; lrpath.ncibi.org). Because LRpath typically accepts p-values as input which are then log-transformed, we exponentiated mappability values before input to preserve the original mappability scale. Results were limited to GO terms with  $\leq 2,000$  genes and  $\text{FDR} \leq 0.05$ .

### *Simulation and enrichment testing of data under the null hypothesis of no GO term enrichment*

We simulated ChIP-seq peaks under the null hypothesis of no association with any GO term. As an alternative to simulating peak locations, we randomly sampled genes with replacement and set the number of times the gene was selected to the count of peaks occurring within the locus of a gene. Genes were sampled in two ways: 1) randomly (not in proportion to locus length), and 2) randomly in proportion to locus length. The first simulates peaks occurring within genes with no dependence on locus length (FET assumption). The second method simulates peaks being assigned to genes with probability in proportion to locus length (binomial test assumption). We simulated datasets of 10,000 peaks with varying percentages (0, 50 and 100%) sampled in proportion to locus length. For FET and ChIP-Enrich, a gene is labeled as having a peak if the count of peaks is  $\geq 1$ . Each GO term was tested for enrichment using FET, the binomial test, and ChIP-Enrich. We repeated this process 1,000 times for each test and percentage of genes sampled by locus length, and calculated the median of the 1,000 simulation p-values at each quantile of the 2,565 GO term p-values to create the plots for the bottom row of Supplementary Figure 7.

To examine the effect of overdispersion (added variation in peak count among genes) on each of the three tests, we simulated data with 100% of peaks sampled by locus length (satisfying the binomial test assumption) but with additional overdispersion in number of peaks per gene. In the simulations above without overdispersion, we sampled genes in proportion to their locus lengths to represent ChIP-seq peaks

occurring in gene loci, by assigning each gene a weight proportional to its locus length. Here, we sample genes in proportion to random deviates of their locus lengths using a gamma distribution with mean equal to the gene's locus length and variance set to one of four different levels (0, 0.01, 0.1, 0.5) to simulate increasing overdispersion. For each simulation, a weight is drawn for each gene and then 10,000 draws of genes are made based on the weights to represent 10,000 peaks. For each gamma variance level, we performed 1,000 simulations. The simulated data was tested for enriched GO terms using FET, ChIP-Enrich and the binomial test, and results were presented as median quantile p-values as above (Supplementary Figure 8).

Code for all simulations is available in Supplementary\_code.zip.

### *GREAT testing on permuted ChIP-seq datasets*

To confirm that our results in Supplementary Figure 4 were not restricted to our implementation of the binomial test, we repeated the analysis of GO term permutations by locus length bins data (permuted ENCODE datasets for SIX5, PAX5, and H3k27me3) with the GREAT website (Supplementary Figure 5). For each of the three experimental datasets, we used GREAT with the “single gene” setting, where “each gene is assigned a regulatory domain that extends in both directions to the nearest gene's TSS but no more than the maximum extension in one direction.” The “maximum extension” was set to 100,000 kb in order to insure each peak is assigned to a regulatory domain (i.e. gene), which is most equivalent to our *nearest TSS* locus definition.

## Supplementary References

1. Ovcharenko I, Loots GG, Nobrega MA, Hardison RC, Miller W, Stubbs L: **Evolution and functional classification of vertebrate gene deserts.** *Genome Res* 2005, **15**(1):137-145.
2. Taher L, Ovcharenko I: **Variable locus length in the human genome leads to ascertainment bias in functional inference for non-coding elements.** *Bioinformatics* 2009, **25**(5):578-584.
3. Rashid NU, Giresi PG, Ibrahim JG, Sun W, Lieb JD: **ZINBA integrates local covariates with DNA-seq data to identify broad and narrow regions of enrichment, even within amplified genomic regions.** *Genome Biol* 2011, **12**(7):R67.
4. Rozowsky J, Euskirchen G, Auerbach RK, Zhang ZD, Gibson T, Bjornson R, Carriero N, Snyder M, Gerstein MB: **PeakSeq enables systematic scoring of ChIP-seq experiments relative to controls.** *Nat Biotechnol* 2009, **27**(1):66-75.
5. Upton GJG: **Fisher's Exact Test.** *Journal of the Royal Statistical Society Series A (Statistics in Society)* 1992, **155**(3):395-402.
6. Reddy TE, Pauli F, Sprouse RO, Neff NF, Newberry KM, Garabedian MJ, Myers RM: **Genomic determination of the glucocorticoid response reveals unexpected mechanisms of gene regulation.** *Genome Res* 2009, **19**(12):2163-2171.
7. Dennis G, Jr., Sherman BT, Hosack DA, Yang J, Gao W, Lane HC, Lempicki RA: **DAVID: Database for Annotation, Visualization, and Integrated Discovery.** *Genome Biol* 2003, **4**(5):3.
8. Kim JH, Karnovsky A, Mahavisno V, Weymouth T, Pande M, Dolinoy DC, Rozek LS, Sartor MA: **LRpath analysis reveals common pathways dysregulated via DNA methylation across cancer types.** *BMC genomics* 2012, **13**(1):526.

## Supplementary Results: Tables

*Supplementary Table 1*

| <b>DNA binding protein</b> | <b>Peak caller</b> | <b>Number of peaks</b> | <b>% of peaks <math>\leq</math> 1kb from TSS</b> |
|----------------------------|--------------------|------------------------|--------------------------------------------------|
| ATF3                       | spp                | 1884                   | 66.9                                             |
| BATF                       | spp                | 24600                  | 4.9                                              |
| BCL11A                     | spp                | 13256                  | 5.7                                              |
| BCL3                       | MACS               | 22503                  | 13.1                                             |
| BCLAF1                     | MACS               | 29162                  | 30.8                                             |
| BHLHE40                    | MACS               | 57698                  | 21.7                                             |
| BRCA1                      | MACS               | 15431                  | 40.6                                             |
| C-Fos                      | spp                | 1744                   | 81.8                                             |
| CHD2                       | MACS               | 42652                  | 29.4                                             |
| CTCF                       | MACS               | 44056                  | 16.1                                             |
| Ctcf                       | Scripture          | 61525                  | 12.8                                             |
| EBF1                       | MACS               | 98976                  | 14.2                                             |
| EGR1                       | spp                | 13662                  | 54.3                                             |
| ELF1                       | spp                | 20528                  | 52.7                                             |
| ETS1                       | spp                | 2879                   | 72.6                                             |
| Ezh2                       | Scripture          | 64277                  | 9.9                                              |
| GABP                       | spp                | 5095                   | 79.9                                             |
| H2az                       | Scripture          | 95358                  | 15.0                                             |
| H3k27ac                    | Scripture          | 56069                  | 18.5                                             |
| H3k27me3                   | Scripture          | 41464                  | 5.4                                              |
| H3k36me3                   | Scripture          | 33710                  | 3.0                                              |
| H3k4me1                    | Scripture          | 109612                 | 8.9                                              |
| H3k4me2                    | Scripture          | 79675                  | 15.3                                             |
| H3k4me3                    | Scripture          | 57476                  | 17.6                                             |
| H3k79me2                   | Scripture          | 28302                  | 13.7                                             |
| H3k9ac                     | Scripture          | 41266                  | 25.5                                             |
| H3k9me3                    | Scripture          | 74515                  | 2.3                                              |
| H4k20me1                   | Scripture          | 23943                  | 5.0                                              |
| JunD                       | spp                | 1715                   | 3.0                                              |
| MAX                        | spp                | 2087                   | 39.7                                             |
| MEF2A                      | spp                | 16694                  | 11.5                                             |
| MEF2C                      | MACS               | 968                    | 15.1                                             |
| NF-E2                      | MACS               | 12973                  | 24.2                                             |
| NFKB                       | spp                | 10073                  | 22.1                                             |
| NRF1                       | spp                | 5042                   | 12.7                                             |
| NRSF                       | spp                | 2541                   | 39.2                                             |
| P300                       | spp                | 3687                   | 16.5                                             |
| PAX5                       | spp                | 19618                  | 18.5                                             |
| PBX3                       | spp                | 7431                   | 26.1                                             |
| POL2                       | MACS               | 14989                  | 33.1                                             |
| POL3                       | MACS               | 112                    | 55.5                                             |

|        |      |       |      |
|--------|------|-------|------|
| POU2F2 | spp  | 14441 | 32.9 |
| PU.1   | spp  | 35821 | 11.3 |
| RAD21  | MACS | 23947 | 6.5  |
| RFX5   | MACS | 26336 | 33.4 |
| RXRA   | spp  | 2965  | 31.4 |
| SIX5   | spp  | 4442  | 74.8 |
| SMC3   | MACS | 64597 | 14.4 |
| SP1    | spp  | 13139 | 46.1 |
| SRF    | spp  | 2412  | 48.7 |
| STAT3  | MACS | 24257 | 15.1 |
| TAF1   | spp  | 5169  | 82.4 |
| TBP    | MACS | 31315 | 30.4 |
| TCF12  | spp  | 15028 | 25.8 |
| TR4    | MACS | 1530  | 29.5 |
| USF1   | spp  | 7074  | 43.0 |
| USF2   | MACS | 30248 | 28.3 |
| WHIP   | MACS | 88803 | 17.0 |
| YY1    | MACS | 42162 | 32.3 |
| ZBTB33 | spp  | 1934  | 64.8 |
| ZEB1   | spp  | 8304  | 46.5 |
| ZNF143 | MACS | 81743 | 18.4 |
| ZNF274 | MACS | 1483  | 1.5  |

**Supplementary Table 1. List of DBPs from Figure 1 with their total peak counts and associated peak caller.**  
All DBPs are from ENCODE cell line GM12878.

Supplementary Table 2

| DBP      | Figure 1 panel | # over-dispersed GO terms | % GO terms over-dispersed | DBP      | Figure 1 panel | # over-dispersed GO terms | % GO terms over-dispersed |
|----------|----------------|---------------------------|---------------------------|----------|----------------|---------------------------|---------------------------|
| ATF3     | a, d           | 630                       | 35                        | PAX5     | b, e           | 1831                      | 100                       |
| cFOS     | a, d           | 758                       | 42                        | POL2     | b, e           | 1828                      | 100                       |
| ETS1     | a, d           | 1253                      | 68                        | POU2F2   | b, e           | 1827                      | 100                       |
| GABP     | a, d           | 1620                      | 88                        | RAD21    | b, e           | 1755                      | 96                        |
| JunD     | a, d           | 692                       | 38                        | RFX5     | b, e           | 1829                      | 100                       |
| MAX      | a, d           | 705                       | 39                        | SP1      | b, e           | 1829                      | 100                       |
| MEF2C    | a, d           | 561                       | 31                        | STAT3    | b, e           | 1830                      | 100                       |
| NF-E2    | a, d           | 1800                      | 98                        | TBP      | b, e           | 1831                      | 100                       |
| NFKB     | a, d           | 1803                      | 98                        | TCF12    | b, e           | 1828                      | 100                       |
| NRSF     | a, d           | 493                       | 27                        | USF2     | b, e           | 1830                      | 100                       |
| P300     | a, d           | 1413                      | 77                        | BHLHE40  | c, f           | 1831                      | 100                       |
| PBX3     | a, d           | 1751                      | 96                        | CHD2     | c, f           | 1832                      | 100                       |
| RXRA     | a, d           | 1319                      | 72                        | CTCF     | c, f           | 1831                      | 100                       |
| SIX5     | a, d           | 1448                      | 79                        | Ctcf     | c, f           | 1831                      | 100                       |
| SRF      | a, d           | 902                       | 49                        | EBF1     | c, f           | 1832                      | 100                       |
| TAF1     | a, d           | 1614                      | 88                        | Ezh2     | c, f           | 1830                      | 100                       |
| TR4      | a, d           | 577                       | 32                        | H2az     | c, f           | 1832                      | 100                       |
| USF1     | a, d           | 1763                      | 96                        | H3k27ac  | c, f           | 1832                      | 100                       |
| ZBTB33   | a, d           | 769                       | 42                        | H3k27me3 | c, f           | 1831                      | 100                       |
| ZEB1     | a, d           | 1807                      | 99                        | H3k36me3 | c, f           | 1832                      | 100                       |
| ZNF274   | a, d           | 832                       | 59                        | H3k4me1  | c, f           | 1832                      | 100                       |
| BATF     | b, e           | 1821                      | 99                        | H3k4me2  | c, f           | 1832                      | 100                       |
| BCL11A   | b, e           | 1813                      | 99                        | H3k4me3  | c, f           | 1832                      | 100                       |
| BCL3     | b, e           | 1826                      | 100                       | H3k9ac   | c, f           | 1832                      | 100                       |
| BCLAF1   | b, e           | 1831                      | 100                       | H3k9me3  | c, f           | 1832                      | 100                       |
| BRCA1    | b, e           | 1824                      | 100                       | MXI1     | c, f           | 1832                      | 100                       |
| EGR1     | b, e           | 1825                      | 100                       | PU1      | c, f           | 1828                      | 100                       |
| ELF1     | b, e           | 1831                      | 100                       | SMC3     | c, f           | 1831                      | 100                       |
| H3k79me2 | b, e           | 1832                      | 100                       | WHIP     | c, f           | 1832                      | 100                       |
| H4k20me1 | b, e           | 1830                      | 100                       | YY1      | c, f           | 1832                      | 100                       |
| MEF2A    | b, e           | 1815                      | 99                        | ZNF143   | c, f           | 1832                      | 100                       |
| NRF1     | b, e           | 1829                      | 100                       |          |                |                           |                           |

**Supplementary Table 2. Significant overdispersion in peak count among genes is observed for a substantial number of GO terms in all 63 ENCODE ChIP-seq datasets from cell line GM12878.** Number and percentage of GO terms (with 50-500 genes) that contain significant overdispersion in peak counts among the genes ( $q \leq 0.05$ ). DBPs from Figure 1b,c have more peaks than DBPs from Figure 1a and thus higher power to detect significant overdispersion.

Supplementary Table 3

| GO Term                                  | # genes | total genes in term | fold enrich | p-value               | q-value              |
|------------------------------------------|---------|---------------------|-------------|-----------------------|----------------------|
| nucleosome                               | 13      | 58                  | 11.64       | $8.0 \times 10^{-10}$ | $2.5 \times 10^{-7}$ |
| protein-DNA complex                      | 14      | 81                  | 8.97        | $4.3 \times 10^{-9}$  | $6.6 \times 10^{-7}$ |
| translation                              | 25      | 314                 | 4.10        | $9.7 \times 10^{-9}$  | $1.3 \times 10^{-5}$ |
| DNA packaging                            | 14      | 105                 | 6.87        | $1.1 \times 10^{-7}$  | $7.2 \times 10^{-5}$ |
| nucleosome assembly                      | 12      | 74                  | 8.35        | $1.6 \times 10^{-7}$  | $7.0 \times 10^{-5}$ |
| chromatin assembly                       | 12      | 77                  | 8.03        | $2.5 \times 10^{-7}$  | $8.0 \times 10^{-5}$ |
| ribosome                                 | 18      | 201                 | 4.65        | $3.4 \times 10^{-7}$  | $2.6 \times 10^{-5}$ |
| protein-DNA complex assembly             | 12      | 81                  | 7.63        | $4.2 \times 10^{-7}$  | $1.1 \times 10^{-4}$ |
| cellular macromolecular complex assembly | 22      | 304                 | 3.73        | $4.6 \times 10^{-7}$  | $1 \times 10^{-4}$   |
| nucleosome organization                  | 12      | 83                  | 7.45        | $5.4 \times 10^{-7}$  | $1 \times 10^{-4}$   |

**Supplementary Table 3. GO terms most strongly associated with short locus length** The 500 genes with shortest locus lengths (ranging from 23bp to 5,066bp) were tested for GO term enrichment relative to all remaining genes (having a computed locus length) using DAVID Bioinformatics Resource 6.7.

Supplementary Table 4

| GO Term                    | # genes | total genes in term | fold enrich | p-value               | q-value               |
|----------------------------|---------|---------------------|-------------|-----------------------|-----------------------|
| homophilic cell adhesion   | 29      | 130                 | 8.65        | $1.9 \times 10^{-18}$ | $3.9 \times 10^{-15}$ |
| nervous system development | 78      | 1066                | 2.84        | $2.2 \times 10^{-17}$ | $2.3 \times 10^{-14}$ |
| cell adhesion              | 60      | 686                 | 3.39        | $9.9 \times 10^{-17}$ | $7.6 \times 10^{-14}$ |
| biological adhesion        | 60      | 687                 | 3.39        | $1.0 \times 10^{-16}$ | $5.7 \times 10^{-14}$ |
| cell-cell adhesion         | 37      | 271                 | 5.30        | $4.3 \times 10^{-16}$ | $1.8 \times 10^{-13}$ |
| generation of neurons      | 43      | 549                 | 3.04        | $2.1 \times 10^{-10}$ | $4.0 \times 10^{-8}$  |
| calcium ion binding        | 58      | 896                 | 2.49        | $2.4 \times 10^{-10}$ | $1.4 \times 10^{-7}$  |
| neurogenesis               | 44      | 591                 | 2.89        | $6.1 \times 10^{-10}$ | $1.1 \times 10^{-7}$  |
| neuron differentiation     | 34      | 429                 | 3.07        | $1.9 \times 10^{-8}$  | $3.0 \times 10^{-6}$  |
| axonogenesis               | 21      | 191                 | 4.26        | $1.0 \times 10^{-7}$  | $1.5 \times 10^{-5}$  |

**Supplementary Table 4. GO terms most strongly associated with long locus length.** The 500 genes with the longest locus lengths (ranging from 879 kb to 15,8 Mb) were tested for GO term enrichment relative to all remaining genes (having a computed locus length) using DAVID Bioinformatics Resource 6.7.



Supplementary Table 5

| <b>a</b> | Rank | GO term                                                                                   | <i>nearest TSS</i><br>q-value          | $\leq 1\text{kb from TSS}$<br>q-value  | GOseq<br>q-value                        |
|----------|------|-------------------------------------------------------------------------------------------|----------------------------------------|----------------------------------------|-----------------------------------------|
|          | 1    | <b>epithelial cell differentiation</b>                                                    | <b><math>1.8 \times 10^{-6}</math></b> | <b>1.0</b>                             | <b><math>1.2 \times 10^{-6}</math></b>  |
|          | 2    | adherens junction                                                                         | $5.3 \times 10^{-5}$                   | 1.0                                    | 0.39                                    |
|          | 3    | anchoring junction                                                                        | $5.3 \times 10^{-5}$                   | 1.0                                    | 0.49                                    |
|          | 4    | <b>negative regulation of sequence-specific DNA binding transcription factor activity</b> | <b><math>5.5 \times 10^{-5}</math></b> | <b>1.0</b>                             | <b><math>3.0 \times 10^{-4}</math></b>  |
|          | 5    | <b>anti-apoptosis</b>                                                                     | <b><math>5.5 \times 10^{-5}</math></b> | <b>0.34</b>                            | <b><math>3.2 \times 10^{-9}</math></b>  |
|          | 6    | regulation of epithelial cell differentiation                                             | $7.6 \times 10^{-5}$                   | 1.0                                    | 0.14                                    |
|          | 7    | basolateral plasma membrane                                                               | $1.7 \times 10^{-4}$                   | 01.0                                   | 0.52                                    |
|          | 8    | unsaturated fatty acid metabolic process                                                  | $2.9 \times 10^{-4}$                   | $3.5 \times 10^{-3}$                   | 0.52                                    |
|          | 9    | <b>icosanoid metabolic process</b>                                                        | <b><math>1.8 \times 10^{-4}</math></b> | <b><math>2.9 \times 10^{-3}</math></b> | <b><math>4.1 \times 10^{-4}</math></b>  |
|          | 10   | focal adhesion                                                                            | $4.5 \times 10^{-4}$                   | 1.0                                    | 0.32                                    |
|          | 11   | cell-substrate junction                                                                   | $4.5 \times 10^{-4}$                   | 1.0                                    | 0.39                                    |
|          | 12   | cell-substrate adherens junction                                                          | $4.5 \times 10^{-4}$                   | 1.0                                    | 0.35                                    |
|          | 13   | <b>regulation of small GTPase mediated signal transduction</b>                            | <b><math>8.7 \times 10^{-4}</math></b> | <b>1.0</b>                             | <b><math>1.3 \times 10^{-3}</math></b>  |
|          | 14   | <b>response to inorganic substance</b>                                                    | <b><math>1.2 \times 10^{-3}</math></b> | <b>0.075</b>                           | <b><math>4.3 \times 10^{-4}</math></b>  |
|          | 15   | response to growth hormone stimulus                                                       | $1.4 \times 10^{-3}$                   | 1.0                                    | 1.0                                     |
|          | 16   | <b>regulation of cellular component movement</b>                                          | <b><math>1.8 \times 10^{-3}</math></b> | <b>0.74</b>                            | <b><math>5.7 \times 10^{-6}</math></b>  |
|          | 17   | monocarboxylic acid metabolic process                                                     | $1.9 \times 10^{-3}$                   | 0.15                                   | 0.66                                    |
|          | 18   | response to calcium ion                                                                   | 0.0024                                 | 0.33                                   | 0.14                                    |
|          | 19   | regulation of anti-apoptosis                                                              | $2.9 \times 10^{-3}$                   | 0.76                                   | 0.63                                    |
|          | 20   | <b>negative regulation of protein metabolic process</b>                                   | <b><math>3.2 \times 10^{-3}</math></b> | <b>0.57</b>                            | <b><math>5.5 \times 10^{-3}</math></b>  |
|          | 21   | response to glucocorticoid stimulus                                                       | $3.5 \times 10^{-3}$                   | 0.56                                   | 0.39                                    |
|          | 22   | positive regulation of anti-apoptosis                                                     | $3.7 \times 10^{-3}$                   | 0.62                                   | 0.49                                    |
|          | 23   | response to corticosteroid stimulus                                                       | $3.9 \times 10^{-3}$                   | 0.63                                   | 0.18                                    |
|          | 24   | regulation of epidermal cell differentiation                                              | $4.1 \times 10^{-3}$                   | 1.0                                    | 0.84                                    |
|          | 25   | Ras protein signal transduction                                                           | $4.1 \times 10^{-3}$                   | 1.0                                    | 0.26                                    |
|          | 26   | energy reserve metabolic process                                                          | $4.2 \times 10^{-3}$                   | 1.0                                    | 0.60                                    |
|          | 27   | <b>negative regulation of transcription from RNA polymerase II promoter</b>               | <b><math>4.4 \times 10^{-3}</math></b> | <b>1.0</b>                             | <b><math>2.5 \times 10^{-6}</math></b>  |
|          | 28   | actin cytoskeleton organization                                                           | $4.4 \times 10^{-3}$                   | 1.0                                    | 0.15                                    |
|          | 29   | <b>vasculature development</b>                                                            | <b><math>4.7 \times 10^{-3}</math></b> | <b>0.97</b>                            | <b><math>7.4 \times 10^{-16}</math></b> |
|          | 30   | <b>small GTPase mediated signal transduction</b>                                          | <b><math>4.7 \times 10^{-3}</math></b> | <b>1.0</b>                             | <b><math>4.9 \times 10^{-3}</math></b>  |

**Supplementary Table 5a. Top enriched GO terms (not collapsed, with  $\leq 500$  genes) for GR ChIP-seq data (4,392 peaks) that were significantly enriched ( $q \leq 0.05$ ) using the *nearest TSS* locus definition. Bolded terms are significantly enriched in both ChIP-Enrich and GOseq results. The complete list of enriched GO terms for GR using the *nearest TSS* and  $\leq 1\text{kb from TSS}$  locus definition is included as a supplemental excel file, "Supplementary\_table\_5expanded.csv"**

| <b>b</b> | Rank | GO term                                                                              | $\leq 1kb$ from TSS<br>q-value         | nearest TSS<br>q-value                 | GOseq<br>q-value                       |
|----------|------|--------------------------------------------------------------------------------------|----------------------------------------|----------------------------------------|----------------------------------------|
|          | 1    | <b>negative regulation of blood coagulation</b>                                      | <b><math>3.2 \times 10^{-7}</math></b> | <b>0.077</b>                           | <b>0.010</b>                           |
|          | 2    | <b>negative regulation of coagulation</b>                                            | <b><math>4.3 \times 10^{-7}</math></b> | <b>0.15</b>                            | <b>0.015</b>                           |
|          | 3    | <b>fibrinolysis</b>                                                                  | <b><math>3.5 \times 10^{-5}</math></b> | <b>0.088</b>                           | <b>0.033</b>                           |
|          | 4    | <b>regulation of blood coagulation</b>                                               | <b><math>7.0 \times 10^{-5}</math></b> | <b>0.011</b>                           | <b><math>5.4 \times 10^{-4}</math></b> |
|          | 5    | regulation of fibrinolysis                                                           | $1.4 \times 10^{-4}$                   | 0.073                                  | 0.11                                   |
|          | 6    | <b>regulation of coagulation</b>                                                     | <b><math>1.4 \times 10^{-4}</math></b> | <b>0.029</b>                           | <b><math>9.9 \times 10^{-4}</math></b> |
|          | 7    | intrinsic to external side of plasma membrane                                        | $1.8 \times 10^{-4}$                   | 0.062                                  | 0.68                                   |
|          | 8    | leukotriene metabolic process                                                        | $2.2 \times 10^{-4}$                   | $6.3 \times 10^{-3}$                   | 1.0                                    |
|          | 9    | <b>positive regulation of coagulation</b>                                            | <b><math>3.1 \times 10^{-3}</math></b> | <b>0.061</b>                           | <b>0.028</b>                           |
|          | 10   | anchored to plasma membrane                                                          | $2.1 \times 10^{-3}$                   | 0.39                                   | 1.0                                    |
|          | 11   | <b>regulation of wound healing</b>                                                   | <b><math>2.9 \times 10^{-3}</math></b> | <b><math>6.4 \times 10^{-3}</math></b> | <b><math>1.4 \times 10^{-4}</math></b> |
|          | 12   | <b>regulation of response to external stimulus</b>                                   | <b><math>2.9 \times 10^{-3}</math></b> | <b>0.014</b>                           | <b><math>5.0 \times 10^{-5}</math></b> |
|          | 13   | <b>positive regulation of coagulation</b>                                            | <b><math>3.0 \times 10^{-3}</math></b> | <b>0.061</b>                           | <b>0.028</b>                           |
|          | 14   | <b>positive regulation of leukocyte chemotaxis</b>                                   | <b><math>3.5 \times 10^{-3}</math></b> | <b>0.092</b>                           | <b>0.017</b>                           |
|          | 15   | platelet alpha granule lumen                                                         | $4.7 \times 10^{-3}$                   | 0.25                                   | 0.61                                   |
|          | 16   | secretory granule lumen                                                              | $4.7 \times 10^{-3}$                   | 0.29                                   | 0.63                                   |
|          | 17   | cytoplasmic membrane-bounded vesicle lumen                                           | $5.1 \times 10^{-3}$                   | 0.25                                   | 0.64                                   |
|          | 18   | ameboidal cell migration                                                             | $5.2 \times 10^{-3}$                   | 0.31                                   | 0.94                                   |
|          | 19   | regulation of nuclease activity                                                      | $5.2 \times 10^{-3}$                   | 0.083                                  | 0.66                                   |
|          | 20   | <b>cellular response to biotic stimulus</b>                                          | <b><math>5.2 \times 10^{-3}</math></b> | <b><math>6.1 \times 10^{-3}</math></b> | <b><math>3.7 \times 10^{-3}</math></b> |
|          | 21   | vesicle lumen                                                                        | $5.5 \times 10^{-3}$                   | 0.20                                   | 0.68                                   |
|          | 22   | nucleotide-binding domain, leucine rich repeat containing receptor signaling pathway | $6.1 \times 10^{-3}$                   | 0.15                                   | 0.32                                   |
|          | 23   | peptidyl-glutamic acid carboxylation                                                 | $6.9 \times 10^{-3}$                   | 0.11                                   | 1.0                                    |
|          | 24   | <b>regulation of leukocyte chemotaxis</b>                                            | <b>0.011</b>                           | <b>0.18</b>                            | <b>0.028</b>                           |
|          | 25   | long-chain fatty acid transport                                                      | 0.011                                  | 0.028                                  | 0.12                                   |
|          | 26   | <b>second-messenger-mediated signaling</b>                                           | <b>0.012</b>                           | <b>0.66</b>                            | <b>0.047</b>                           |
|          | 27   | <b>positive regulation of leukocyte migration</b>                                    | <b>0.014</b>                           | <b>0.20</b>                            | <b>0.031</b>                           |
|          | 28   | carboxylic acid transport                                                            | 0.014                                  | 0.18                                   | 0.39                                   |
|          | 29   | external side of plasma membrane                                                     | 0.015                                  | 0.63                                   | 1.0                                    |
|          | 30   | endoplasmic reticulum unfolded protein response                                      | 0.069                                  | 0.015                                  | 0.29                                   |

**Supplementary Table 5b. Top enriched GO terms (not collapsed, with  $\leq 500$  genes) for GR ChIP-seq data (4,392 peaks) that were significantly enriched ( $q \leq 0.05$ ) using the  $\leq 1kb$  from TSS locus definition. Bolded terms are significantly enriched in both ChIP-Enrich and GOseq results. The complete list of enriched GO terms for GR using the *nearest TSS* and  $\leq 1kb$  from TSS locus definition is included as a supplemental excel file, "Supplementary\_table\_5expanded.csv"**



# Supplementary Results: Figures

## Supplementary Figure 1

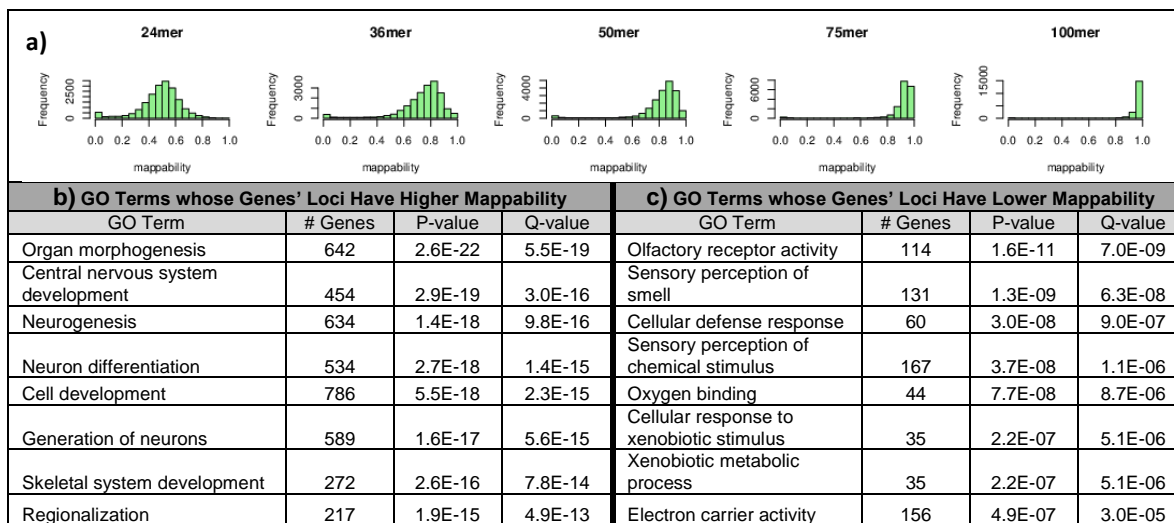

**Supplementary Figure 1. Gene loci with high (or low) average mappability are enriched for specific Gene Ontology terms.** (a) Distribution of human (hg19) mappability scores (calculated as the average mappability for each gene locus using the *nearest TSS* locus definition) for five different sequencing read lengths. (b) Most significantly enriched GO terms associated with high mappability using 50mer reads (c) Most significantly enriched GO terms associated with low mappability using 50mer reads. GO biological processes and molecular functions were tested using the LRpath gene set enrichment program [7].

Supplementary Figure 2

Expected fit - peaks independent of locus length —  
Expected fit - peaks proportional to locus length —  
Cubic smoothing spline fit —  
Proportion of genes in bin with at least 1 peak •

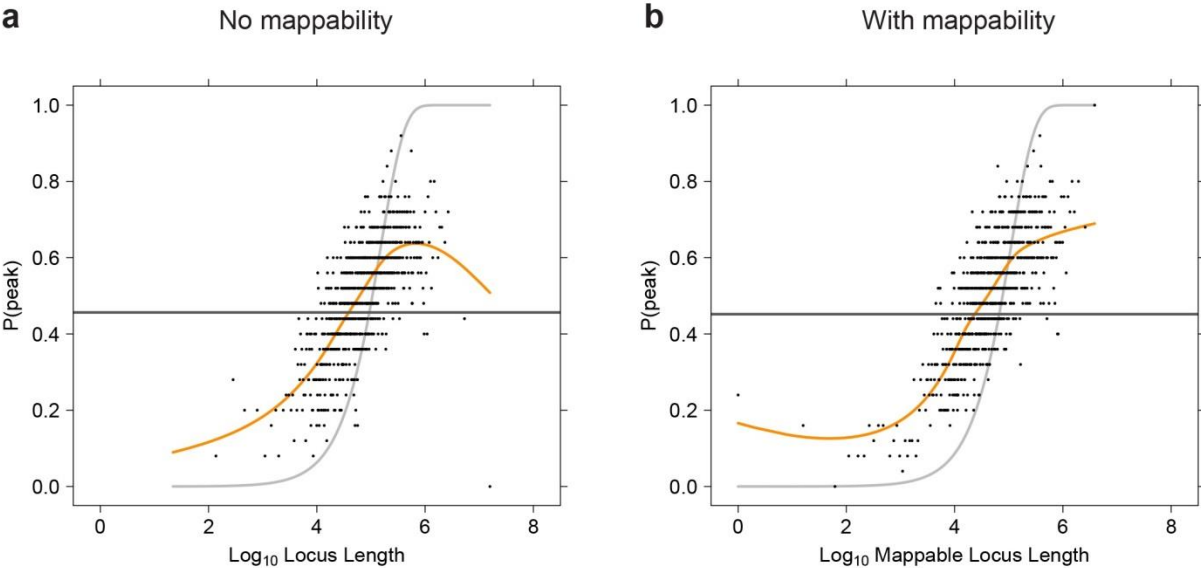

**Supplementary Figure 2. Using the mappable locus length (locus length x mappability) tends to improve the fit of the binomial cubic smoothing spline in the model, illustrated here with PAX5.** Adjusting for mappability often shifts up the spline fit for the longest locus lengths; the dip in the fit without mappability is due to outlier points with long locus length and very low mappability.

### Supplementary Figure 3

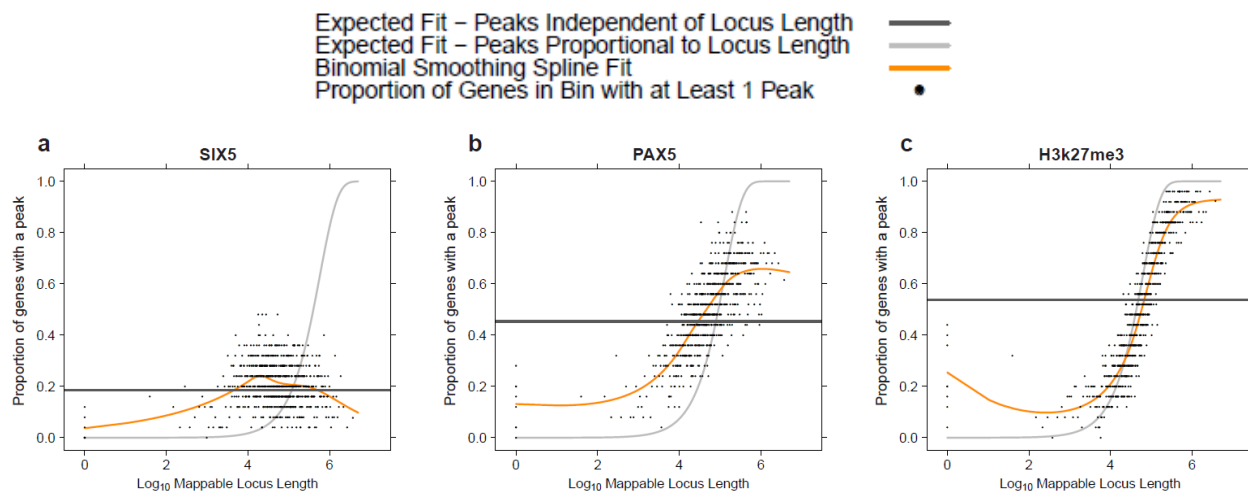

**Supplementary Figure 3. SIX5, PAX5, and H3K27me3 have different gene locus-length-to-peak presence relationships.** SIX5 (also in Figure 1a) has a weak relationship; PAX5 (also in Figure 1b) has a mid-level relationship; H3K27me3 (also in Figure 1c) has a strong relationship. The relationships between locus length and proportion of genes with a peak were estimated using a binomial cubic smoothing spline (orange line). Expected line if no relationship between presence of  $\geq 1$  peak and log<sub>10</sub> locus length (dark gray, satisfies Fisher's exact test assumptions). Expected line if number of peaks observed is proportional to locus length (light gray, binomial test assumption). For visualization only, each point is the proportion of genes assigned a peak within sequential bins of 25 genes.

Supplementary Figure 4

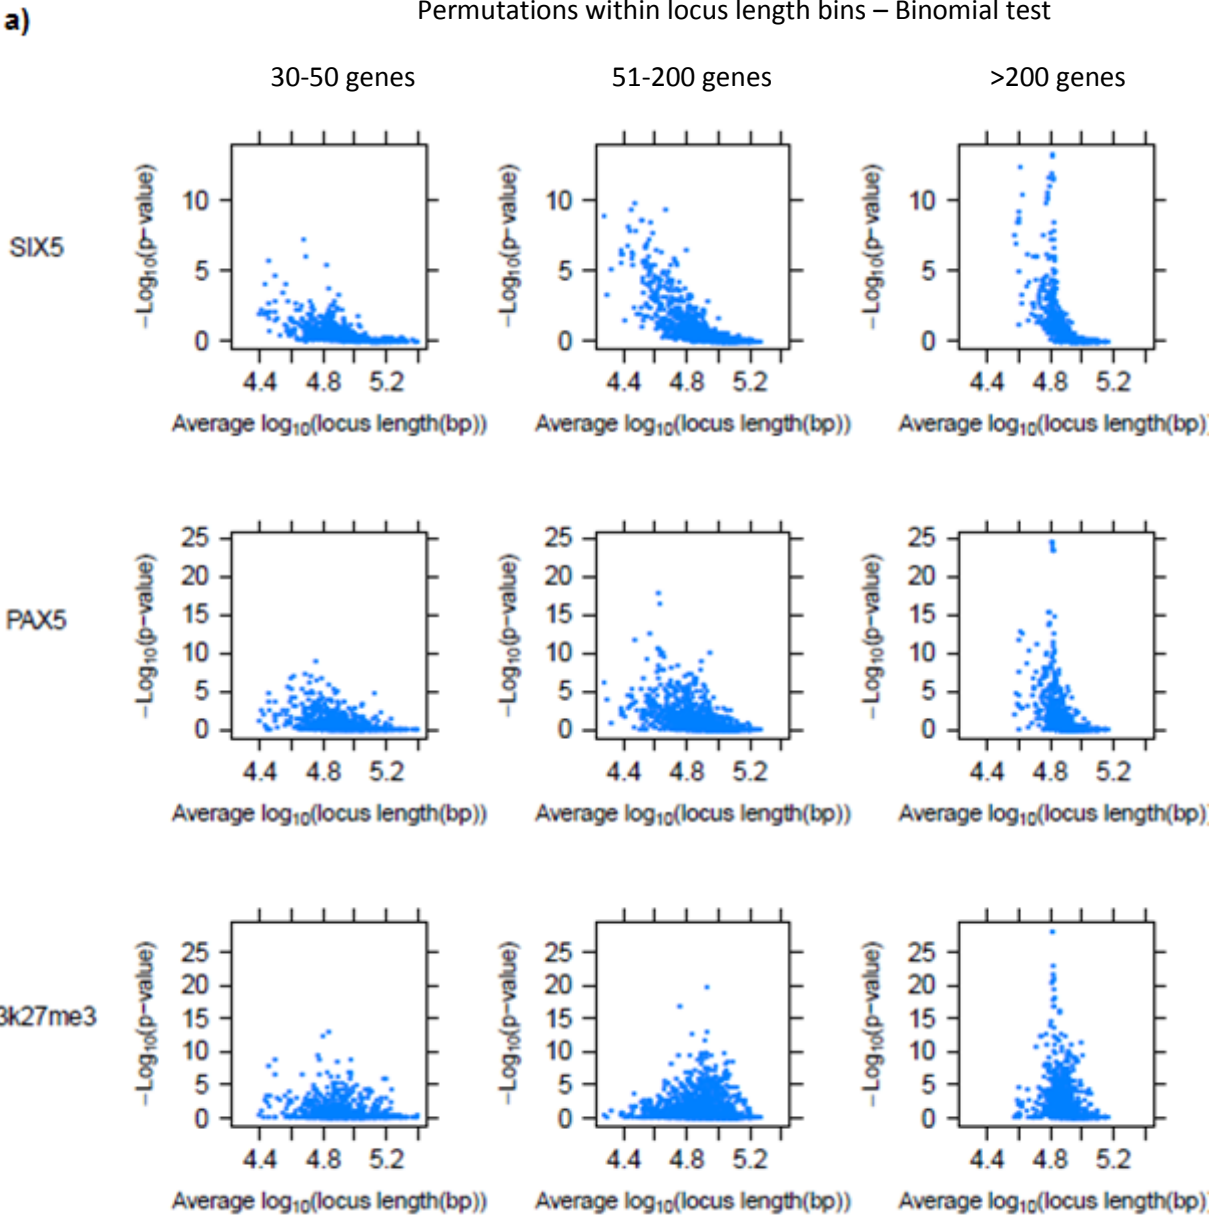

b)

Permutations within locus length bins – ChIP-Enrich

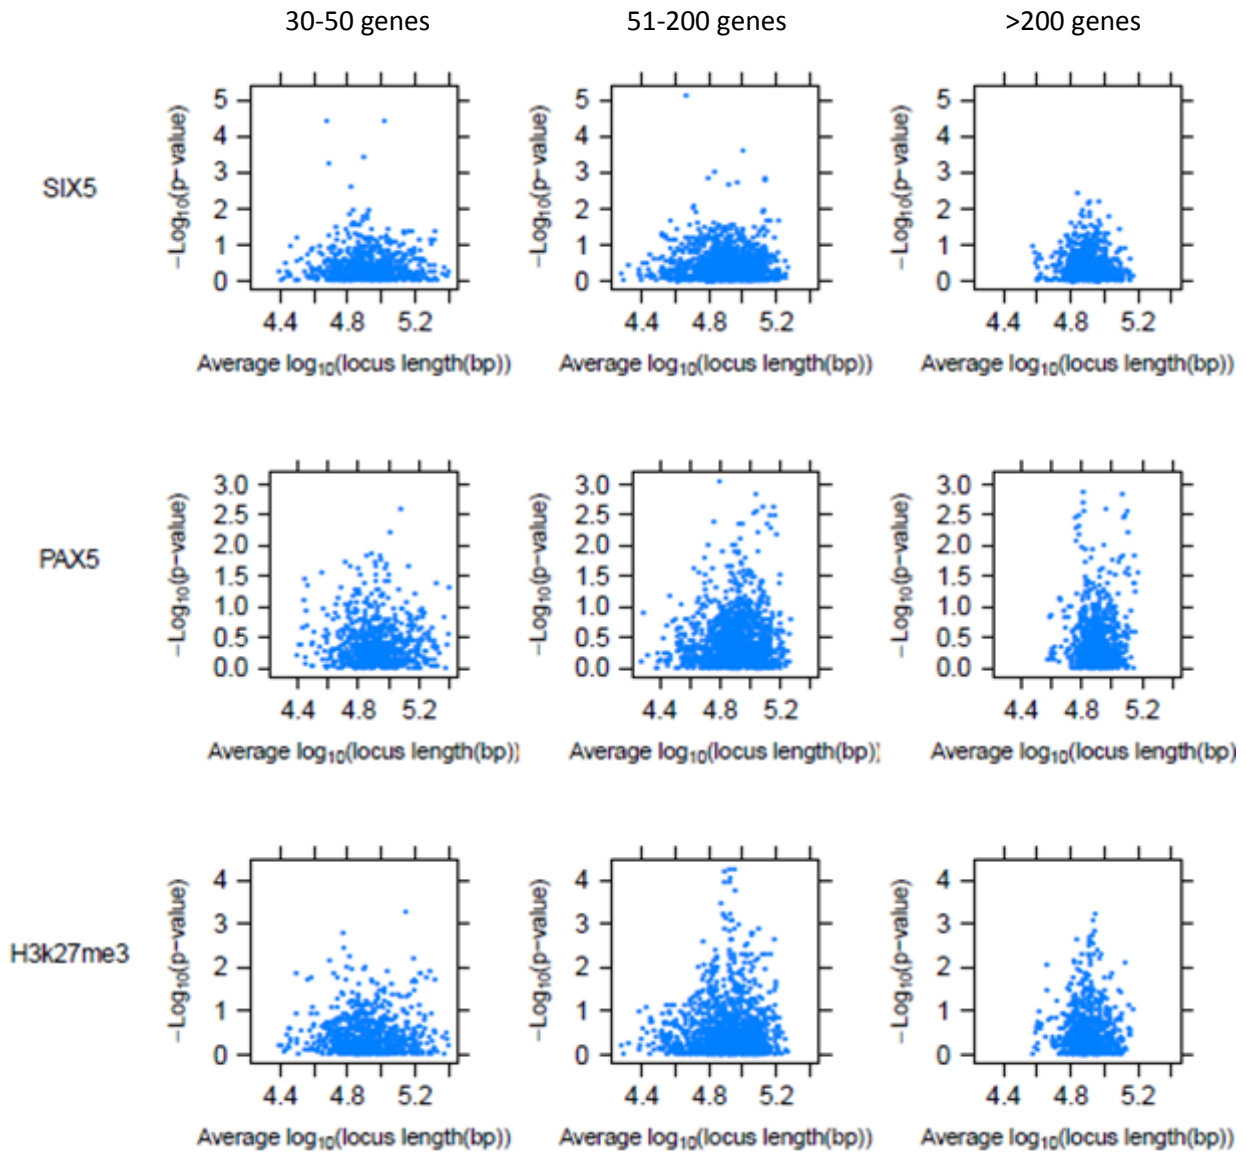

**Supplementary Figure 4. The binomial test tends to identify gene sets with short locus length as significant ( $p < 0.05$ ), especially for SIX5.** Panel (a) shows the  $-\text{log}_{10}$  p-values from the binomial test versus the average  $\text{log}_{10}$  locus length of each gene set tested. Each row shows results from a permutation of the DBP dataset, where the original DBP dataset has been permuted by shuffling genes within bins of locus length. Each column subdivides all gene sets by their number of genes: the first column has gene sets with 30-50 genes, the next 51-200 genes, and the last > 200 genes. Panel (b) shows plots as in (a) for ChIP-Enrich. The binomial test shows a trend of much larger  $-\text{log}_{10}$  p-values for gene sets with low average  $\text{log}_{10}$  locus length, and this trend is most pronounced for sets of genes with fewer than 200 genes (first and second columns.) ChIP-Enrich does not show this trend for any of the three datasets tested.



Supplementary Figure 5

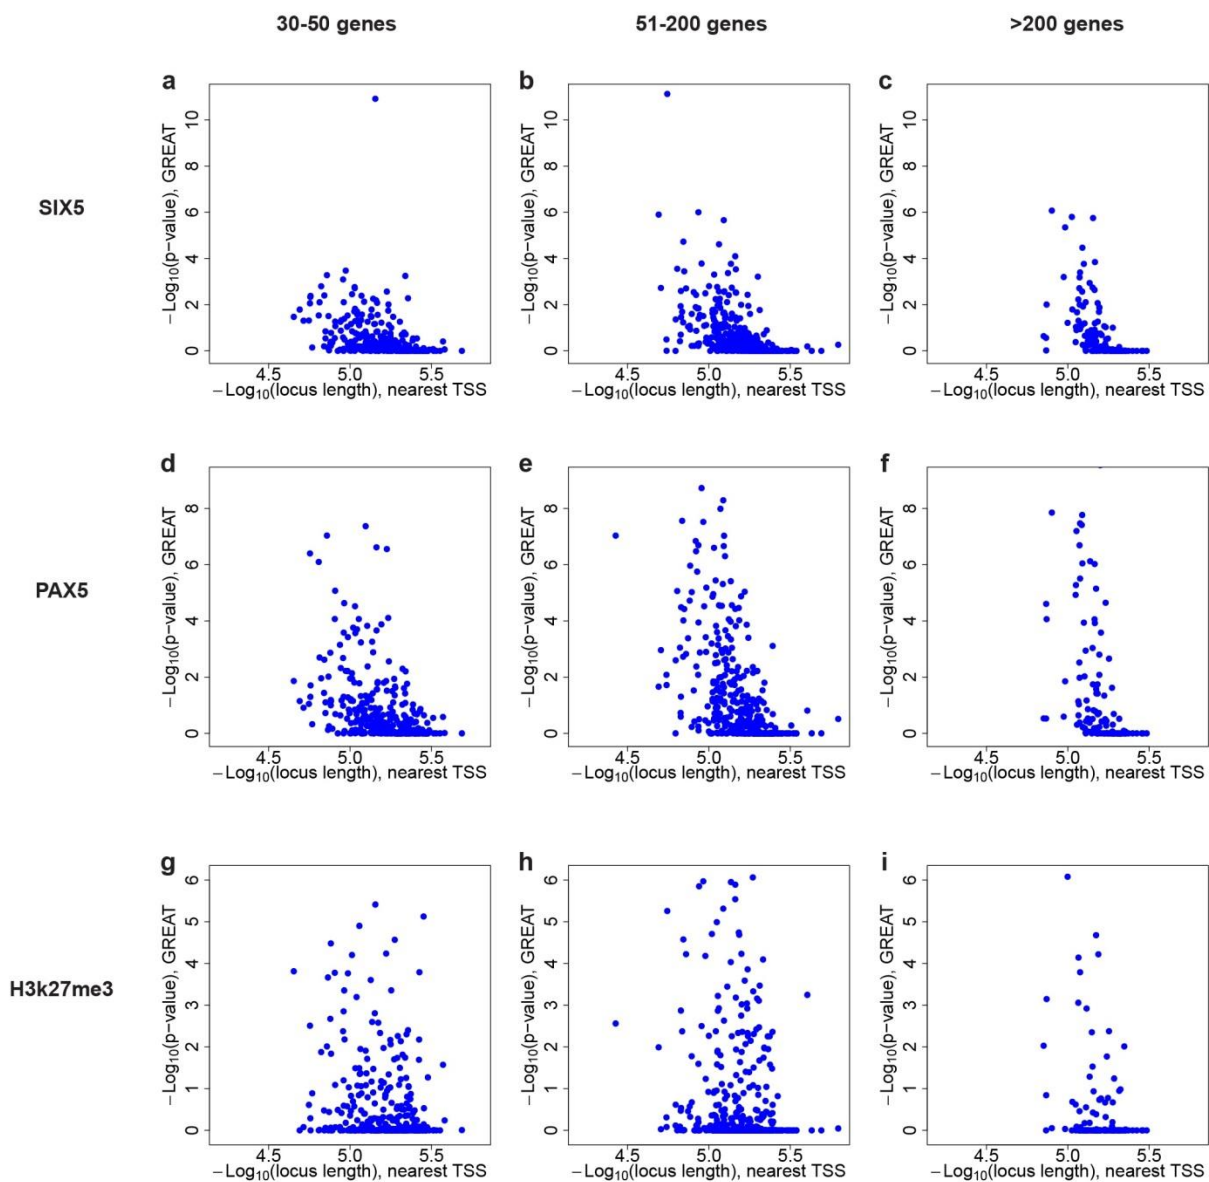

**Supplementary Figure 5. The GREAT website test tends to detect gene sets with shorter than average locus length, especially for SIX5.** Plots show the  $-\log_{10}$  p-values from the GREAT test versus the average  $\log_{10}$  locus length of each gene set tested. Each row show results from a permutation of the DBP dataset, where the original DBP dataset has been permuted by shuffling genes within bins of locus length. Each column subdivides all gene sets by their number of genes. Gene set enrichment testing using GREAT on each set of permuted peaks from SIX5, PAX5, and H3k27me3 found significantly enriched GO terms ( $\text{FDR} \leq 0.05$ ), when none should have been detected. The trend with locus length was again greatest for SIX5 and least for H3k27me3.

## Supplementary Figure 6

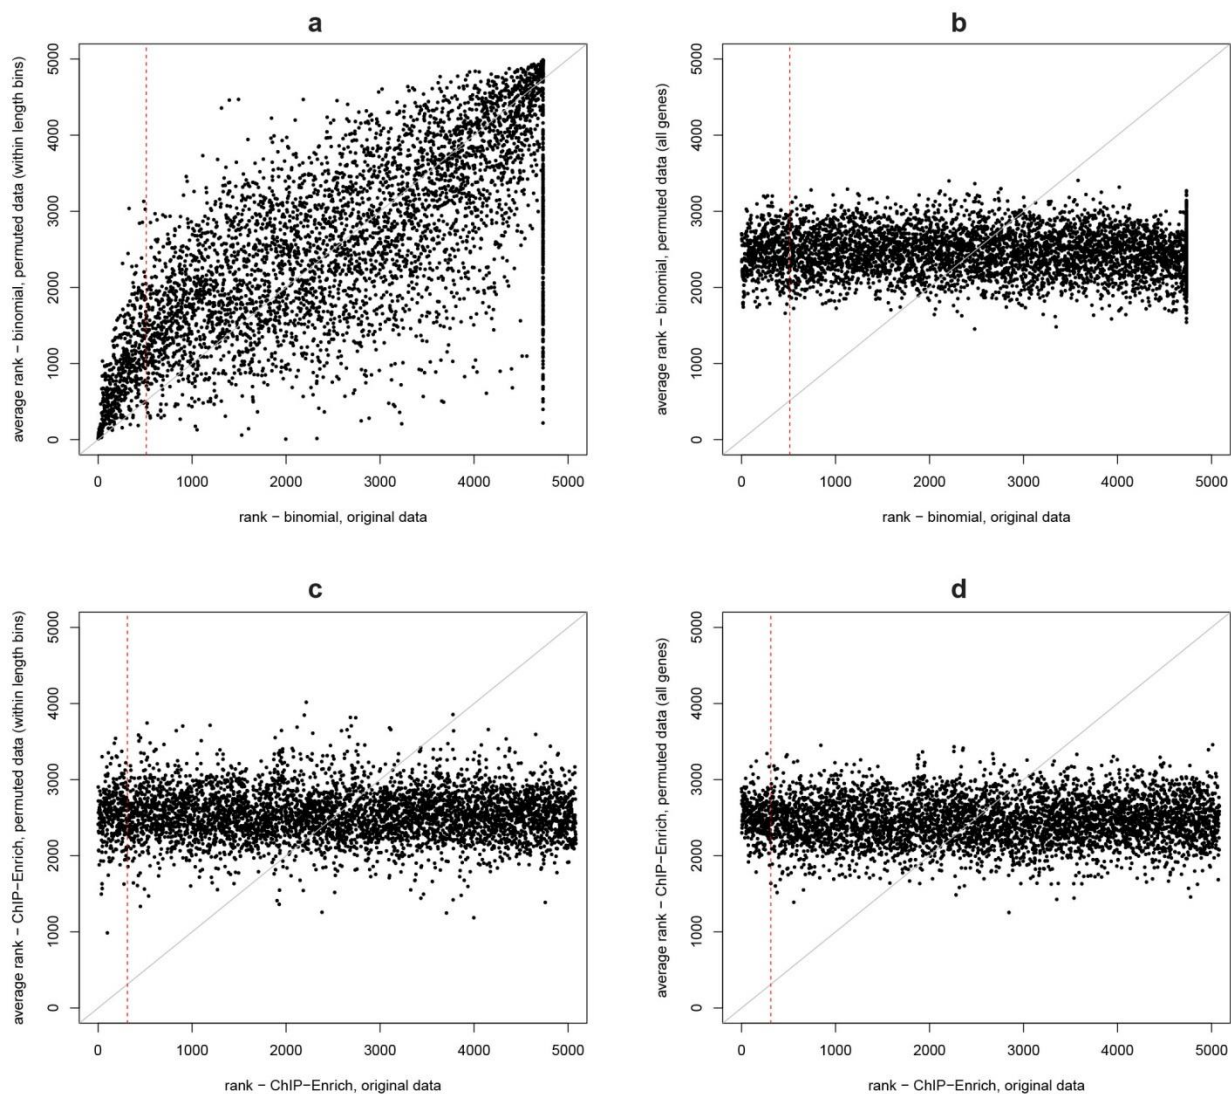

**Supplementary Figure 6. For SIX5 the ranks of the binomial test results from the original data are highly correlated the average ranks from 25 permutations (within locus length bins) of the original data (Spearman  $r = 0.71$ ). For ChIP-Enrich the rank of test results from original data and the average rank permuted data are not correlated.** The fact that this correlation is not observed in (b, permutations across all genes), implies that the correlation is due to the locus length bias. Each plot compares the average ranks of results from 25 permutations to rank in the original data, and the red dash line indicates the highest rank where  $FDR \leq 0.05$  for the original data. (a) Binomial test results for permutations within locus length bins. Of the 509 significantly enriched ( $FDR \leq 0.05$ ) GO terms (with  $\leq 500$  genes) using the original, non-permuted data, 413 (81.1%) were also significantly enriched in at least one of the permuted data sets. Of the 4,325 not significantly enriched GO terms, only 583 (13.5%) were enriched in at least one of the permuted data sets. (b) Binomial test results from permutations across all genes. The average ranks of the binomial test results are not correlated with the ranks of the original data (Spearman  $r = -0.06$ ), indicating that the correlation in (a) is due to the confounding by locus length. ChIP-Enrich test results from (c) permutations within locus length bins and (d) permutations across all genes, respectively. In both permutation scenarios, the ranks of ChIP-Enrich results from permuted and the original data were not correlated (Spearman  $r = -0.02$  and  $-0.005$ , respectively).

## Supplementary Figure 7

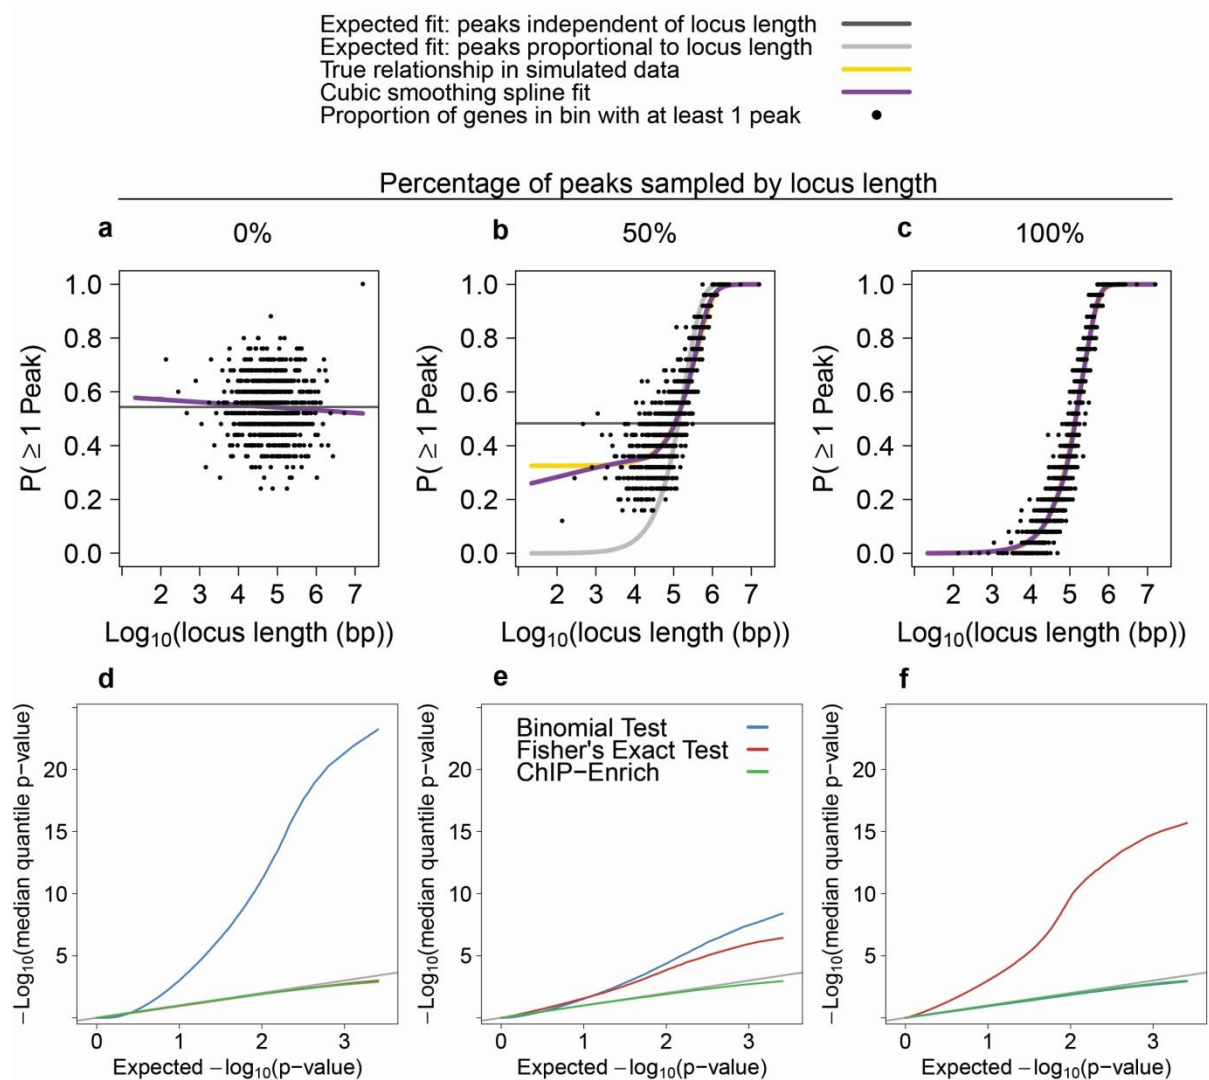

**Supplementary Figure 7. Relationship in simulated datasets between locus length and presence of at least one peak (a-c), and QQ-plots showing the type 1 error rate of Fisher's exact test, the binomial test, and ChIP-Enrich under these relationships (d-f).** Simulated datasets of 10,000 peaks and 0% (a, d), 50% (b, e), or 100% (c, f) of peaks sampled in proportion to locus length. **Top row (a-c)** - For visualization, each point is a bin of 25 genes, plotted as the average proportion of genes having a peak within the bin against the average  $\log_{10}$  locus length. The dark grey horizontal line represents the model where peaks occur within genes with no relationship to their locus length. The light grey line represents the probability of a locus having  $\geq 1$  peak if peaks are randomly distributed across the genome (binomial test assumption). The purple line is a binomial smoothing spline fit to the underlying data (the 0/1 vector denoting whether a peak was assigned to a gene vs. the  $\log_{10}$  locus length of each gene). The yellow line represents the known relationship that exists in the simulated data. **Bottom row (d-f)** - QQ plots showing Fisher's exact and the binomial test represent two extreme assumptions for enrichment testing for ChIP-seq data, while ChIP-Enrich empirically estimates the correct balance between these two extremes. Incorrect assumptions at either end leads to biased significance levels. Median p-values (solid lines) are shown for 1000 simulations of Fisher's exact test, ChIP-Enrich, and the binomial test.

## Supplementary Figure 8

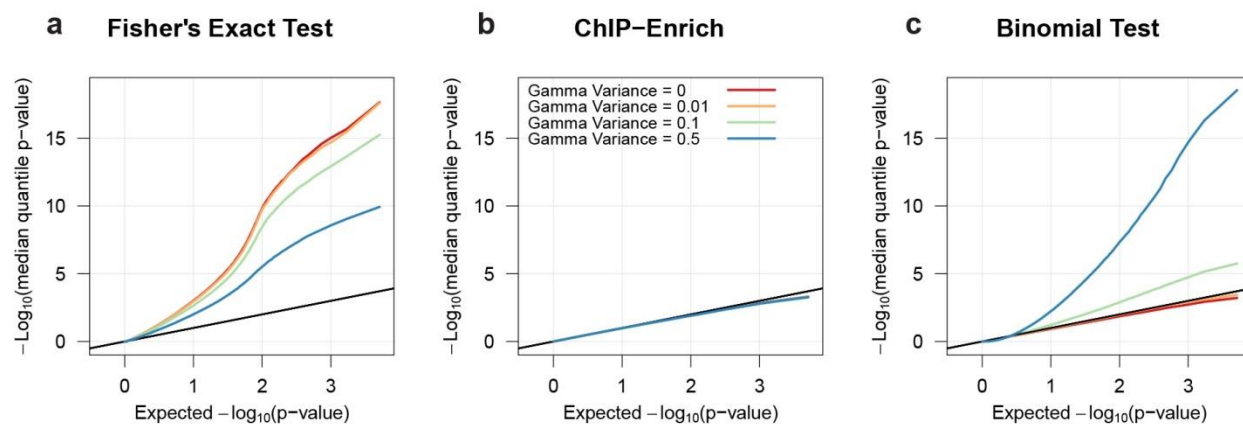

**Supplementary Figure 8. Increasing overdispersion in peak counts among genes increases the type 1 error rate of the binomial test, decreases type 1 error for Fisher's exact test, and has no effect on ChIP-Enrich.** QQ plots of expected versus observed  $-\log_{10}(\text{p-values})$  for (a) Fisher's exact test, (b) ChIP-Enrich, and (c) the binomial test. Increasing levels of overdispersion, modeled using a gamma distribution, were assessed ranging from no overdispersion (red) to a gamma distribution with variance = 0.5 (blue). Red line (no overdispersion) represents the same simulation as that in Supplementary Figure 7c,f. Simulated datasets of 10,000 peaks were used, and median p-values for 1000 simulations are shown.

Supplementary Figure 9

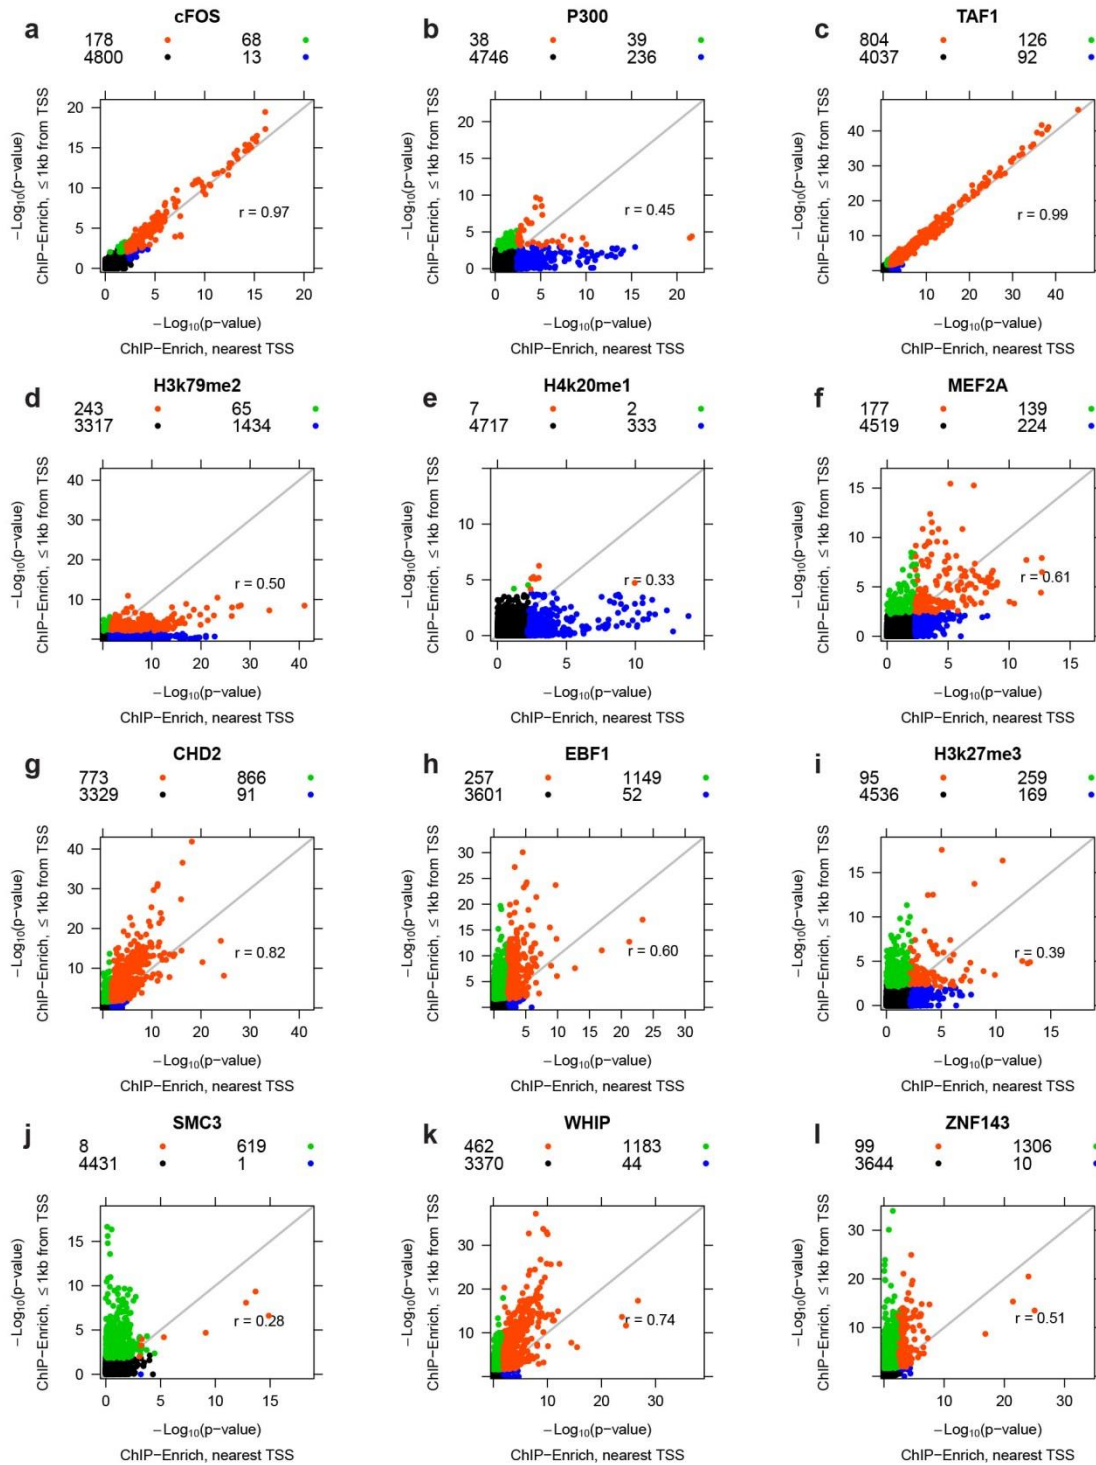

**Supplementary Figure 9. Gene set enrichment testing using  $\leq 1\text{kb}$  from TSS and nearest TSS locus definitions often identifies very different sets of significant GO terms for the same DBP.** Comparison of  $-\log_{10}(\text{p-values})$  from testing GO terms with ChIP-Enrich using  $\leq 1\text{kb}$  from TSS versus nearest TSS locus definitions in ENCODE data for the GM12878 cell line. GO terms with: FDR  $\leq 0.05$  for  $\leq 1\text{kb}$  from TSS only (green); FDR  $\leq 0.05$  for nearest TSS only (blue); FDR  $\leq 0.05$  for  $\leq 1\text{kb}$  from TSS and nearest TSS (orange); FDR  $> 0.05$  in both analyses (black).  $r$ : Pearson correlation coefficient. DBPs are arranged by groupings in Figure 1A, (a-c) are DBPs with low number of peaks, (d-f) are DBPs with medium number of peaks, and (g-l) are DBPs with high number of peaks. The numbers associated with each colour in the legends indicate the number of each coloured dot in each figure.

Supplementary Figure 10

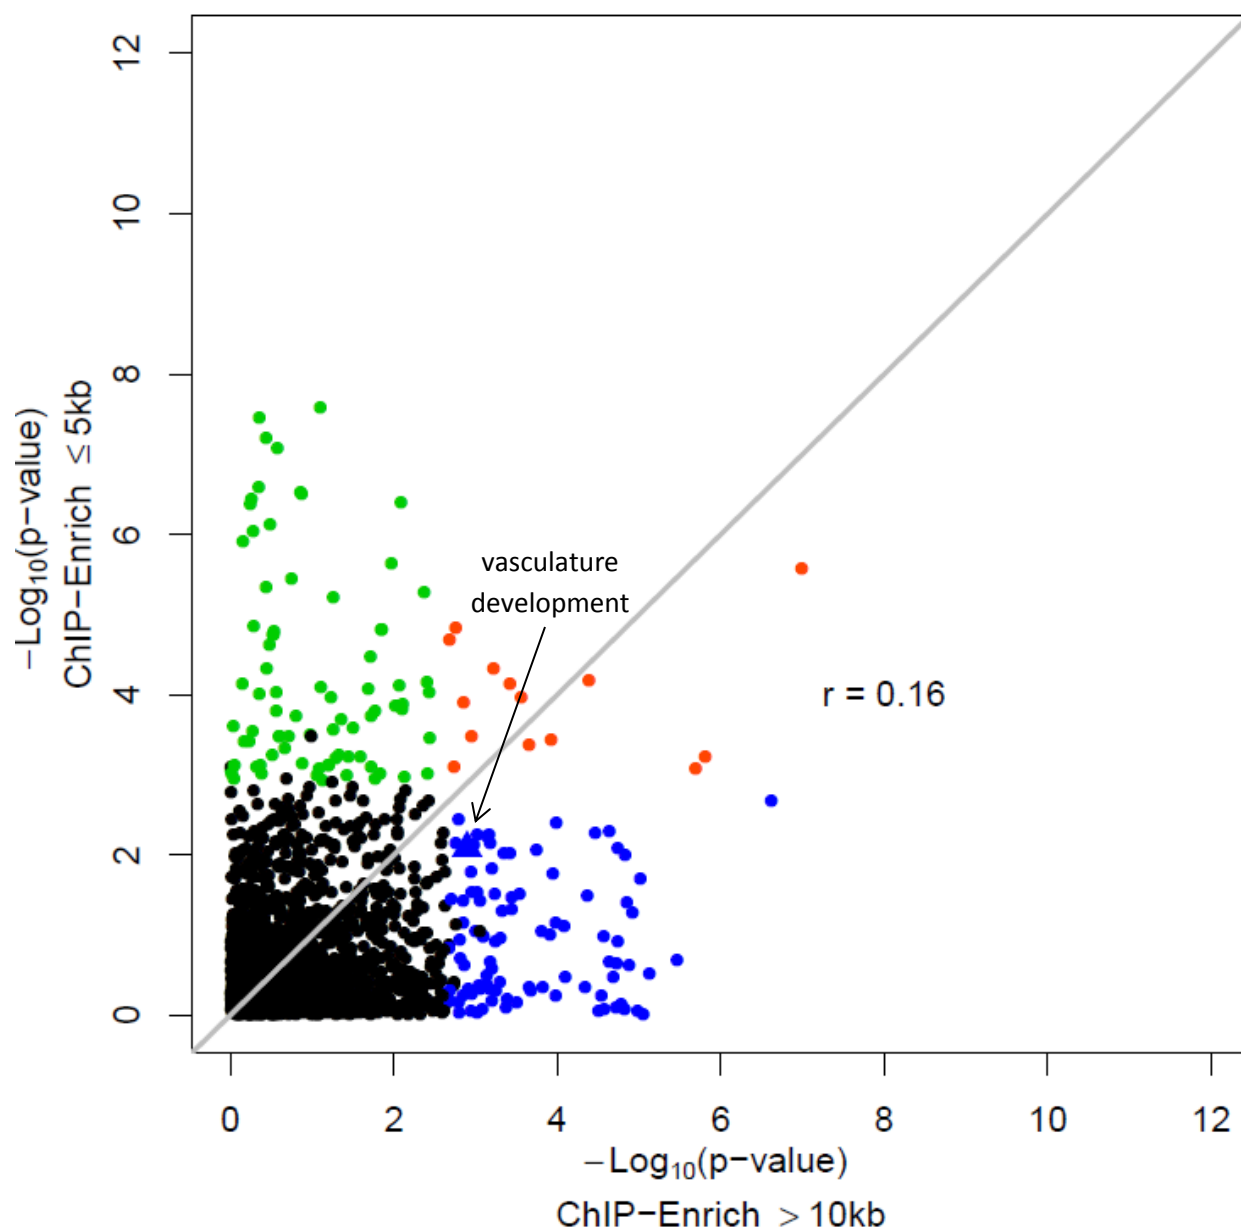

**Supplementary Figure 10. A comparison of ChIP-Enrich GO term enrichment results for GR using peaks  $\leq 5\text{kb}$  from the TSS and peaks  $>10\text{kb}$  from the TSS.** Only 14 gene sets were significantly enriched ( $q \leq 0.05$ ) in both tests. Vasculature development (shown as the blue triangle) was only significant using peaks  $>10\text{kb}$  from the TSS. GO terms with: FDR  $\leq 0.05$  for  $\leq 5\text{kb}$  from TSS only (green); FDR  $\leq 0.05$  for  $>10\text{kb}$  from TSS only (blue); FDR  $\leq 0.05$  for  $\leq 5\text{kb}$  from TSS and  $\geq 10\text{kb}$  from TSS (orange); FDR  $> 0.05$  in both analyses (black).  $r$ : Pearson correlation coefficient.
